# Supplementary material for: The Impact of Different Types of Shift Work on Blood Pressure and Hypertension: A Systematic Review and Meta-Analysis
Source: MDPI journal article supplement (doi:10.3390/ijerph18136738), 2021-06-23
Supplement: s1 [file s1]

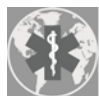

*Systematic Review - Supplementary Materials*

# The impact of shift work on blood pressure and hypertension: a systematic review and meta-analysis

Sara Gamboa Madeira\*, Carina Fernandes, Teresa Paiva, Carlos Santos Moreira and Daniel Caldeira

**Supplementary Materials:** The following are available online at [www.mdpi.com/xxx/s1](http://www.mdpi.com/xxx/s1).

Figure S1: Funnel plots and P-value (for Egger test) for each outcome.

Table S1: Search strategy.

Table S2: Key studies excluded at full-text stage, with reasons.

Table S3: Newcastle-Ottawa Quality Assessment Score (NOS).

Table S4: Results from univariate meta-regression analysis.

Table S5: Results from multivariate meta-regression analysis.

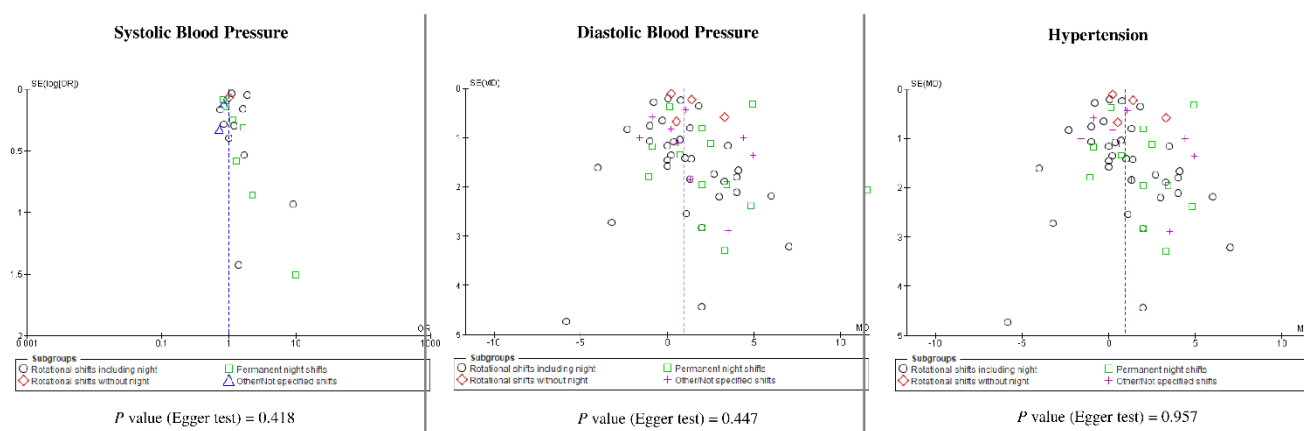

**Figure S1.** Funnel plots and P-value (for Egger test) for each outcome, systolic blood pressure, diastolic blood pressure, and hypertension.

**Table S1.** Search strategy

| #  | MEDLINE (OVID interface)                                                                                            |
|----|---------------------------------------------------------------------------------------------------------------------|
| 1  | exp Work Schedule Tolerance/                                                                                        |
| 2  | exp Shift Work Schedule/                                                                                            |
| 3  | exp Sleep Disorders, Circadian Rhythm/                                                                              |
| 4  | (shiftwork* or shift-work* or (shift* adj3 work*)).ab,ti.                                                           |
| 5  | (nightshift* or nightwork* or night-work or overnight shift* or (night* adj3 shift*) or (night* adj3 work*)).ab,ti. |
| 6  | (rotat* adj3 (shift* or work*)).ab,ti.                                                                              |
| 7  | 1 or 2 or 3 or 4 or 5 or 6                                                                                          |
| 8  | "hypertens*".ab,ti.                                                                                                 |
| 9  | bloodpressure.ab,ti.                                                                                                |
| 10 | ((diastolic or systolic or arterial or blood) adj3 pressur*).ab,ti.                                                 |
| 11 | (BP or SBP or DBP).ab,ti.                                                                                           |
| 12 | exp Hypertension/                                                                                                   |
| 13 | exp Blood Pressure/                                                                                                 |
| 14 | 8 or 9 or 10 or 11 or 12 or 13                                                                                      |
| 15 | 7 and 14                                                                                                            |
| 16 | remove duplicates from 15                                                                                           |
| 17 | limit 16 to humans                                                                                                  |

**Table S2.** Key studies excluded at full-text stage, with reasons.

| Author<br>Year      | Design | Population                                | Sex | Reason                                     |
|---------------------|--------|-------------------------------------------|-----|--------------------------------------------|
| Fujino<br>2006      | CH     | Multiple                                  | M   | Self-reported diagnosis of HTN             |
| Hublin<br>2010      | CH     | Multiple                                  | F&M | Self-reported diagnosis of HTN             |
| Lieu<br>2012        | CH     | Nurses                                    | F   | Self-reported diagnosis of HTN             |
| Ellingsen<br>2007   | CS     | Fertilizer<br>plant                       | M   | No definition of HTN diagnosis             |
| Lajoie<br>2015      | CS     | Hospital<br>employees                     | F   | BP cut-off of 130/85mmHg                   |
| Li<br>2011          | CH     | Multiple                                  | F&M | BP cut-off of 130/85mmHg                   |
| Pietroiusti<br>2009 | CH     | Nurses                                    | F&M | BP cut-off of 130/85mmHg                   |
| Tucker<br>2012      | CH     | Multiple                                  | F&M | BP cut-off of 130/85mmHg                   |
| McNamee<br>1996     | CH     | Industrial<br>workers                     | M   | BP cut-off of 160/95mmHg                   |
| Peter<br>1999       | CS     | Multiple                                  | M   | BP cut-off of 160/95mmHg                   |
| Sternberg<br>1995   | CS     | Bakery                                    | M   | No dispersion measure for BP               |
| Ghazanfari<br>2016  | CH     | Steel com-<br>pany                        | M   | Apparent population overlap with Fesharaki |
| Fesharaki<br>2014   | CH     | Steel com-<br>pany                        | M   | Apparent population overlap with Fesharaki |
| Fesharaki<br>2013   | CH     | polyacryl<br>corporation                  | M   | Apparent population overlap with Fesharaki |
| Guo<br>2015         | CS     | motor<br>corporation                      | M   | Apparent population overlap with Guo       |
| Kawada<br>2010      | CS     | car manufac-<br>turing<br>company         | M   | Apparent population overlap with Kawada    |
| Lin<br>2009         | CS     | electronics<br>manufactur-<br>ing company | F   | Apparent population overlap with Lin       |
| Morikawa<br>1999    | CS     | zipper and<br>sash factory                | M   | Apparent population overlap with Morikawa  |
| Murata<br>2005      | CH     | copper-<br>smelting<br>plant              | M   | Apparent population overlap with Murata    |
| Suwazono<br>2008    | CS     | steel com-<br>pany                        | M   | Apparent population overlap with Sakata    |
| Tenkane<br>1997     | CS     | industrial<br>workers                     | M   | Apparent population overlap with Virkkunen |

---

CS: Cross-sectional study or cross-sectional data; CH: Cohort study; BP: blood pressure;  
HTN: hypertension; F: Female; M: Male

**Table S3.** Newcastle-Ottawa Quality Assessment Score (NOS)

| NOS Dimension      | Selection |    |    |    | Comparability | Outcome |    |    | Score Total |
|--------------------|-----------|----|----|----|---------------|---------|----|----|-------------|
| Author Year        | 1)        | 2) | 3) | 4) | 1)            | 1)      | 2) | 3) |             |
| Asare-Anane 2015   | 0         | 0  | 0  | 1  | 0             | 2       | 1  | .  | 4           |
| Attarchi 2012      | 1         | 0  | 1  | 1  | 2             | 2       | 1  | .  | 8           |
| Balieiro 2014      | 0         | 0  | 0  | 1  | 0             | 2       | 1  | .  | 4           |
| Biggi* 2008        | 1         | 1  | 1  | 0  | 2             | 1       | 1  | 1  | 8           |
| Bursey 1990        | 0         | 0  | 0  | 2  | 0             | 2       | 1  | .  | 5           |
| Chan 1993          | 0         | 0  | 0  | 1  | 0             | 2       | 1  | .  | 4           |
| Chen 2010          | 0         | 0  | 0  | 1  | 0             | 2       | 1  | .  | 4           |
| De Bacquer 2009    | 1         | 0  | 1  | 1  | 0             | 2       | 1  | .  | 6           |
| DeGaude-maris 2011 | 1         | 0  | 1  | 1  | 0             | 2       | 1  | .  | 6           |
| Di Lorenzo 2003    | 1         | 0  | 1  | 1  | 0             | 2       | 1  | .  | 6           |
| Ely 1986           | 1         | 0  | 1  | 1  | 0             | 2       | 1  | .  | 6           |
| Ohlander 2015      | 1         | 0  | 0  | 2  | 2             | 2       | 1  | .  | 8           |
| Fesharaki 2014     | 1         | 0  | 0  | 2  | 2             | 2       | 1  | .  | 8           |
| Guo 2013           | 1         | 0  | 1  | 1  | 0             | 2       | 1  | .  | 6           |
| Ghiasvand 2006     | 0         | 0  | 0  | 1  | 2             | 2       | 1  | .  | 6           |
| Ishizuka 1993      | 0         | 0  | 0  | 2  | 0             | 2       | 1  | .  | 5           |
| Jermendy 2012      | 0         | 0  | 0  | 1  | 0             | 2       | 1  | .  | 4           |
| Kantermann 2013    | 0         | 0  | 0  | 1  | 0             | 2       | 1  | .  | 4           |
| Kawabe 2014        | 1         | 0  | 0  | 1  | 0             | 2       | 1  | .  | 5           |
| Kawada 2014        | 1         | 0  | 0  | 1  | 0             | 2       | 1  | .  | 5           |
| Kawakami 1998      | 1         | 0  | 1  | 1  | 2             | 2       | 1  | .  | 8           |
| Knutsson 1988      | 0         | 0  | 0  | 1  | 0             | 2       | 1  | .  | 4           |

|                            |   |   |   |   |   |   |   |   |   |
|----------------------------|---|---|---|---|---|---|---|---|---|
| Kubo*<br>2013              | 1 | 1 | 1 | 1 | 2 | 1 | 1 | 0 | 8 |
| Lang<br>1988               | 1 | 0 | 0 | 1 | 0 | 2 | 1 | . | 5 |
| Lercher<br>1993            | 1 | 0 | 1 | 1 | 2 | 2 | 1 | . | 8 |
| Lin<br>2015                | 0 | 0 | 0 | 1 | 0 | 2 | 1 | . | 4 |
| Marqueze<br>2013           | 1 | 0 | 0 | 1 | 0 | 2 | 1 | . | 5 |
| Nazri<br>2008              | 1 | 0 | 0 | 1 | 2 | 2 | 1 | . | 7 |
| Mohebbi<br>2012            | 0 | 0 | 0 | 1 | 0 | 2 | 1 | . | 4 |
| Morikawa<br>2007           | 1 | 0 | 0 | 1 | 0 | 2 | 1 | . | 5 |
| Moy<br>2010                | 1 | 0 | 1 | 1 | 0 | 2 | 1 | . | 6 |
| Murata<br>1999             | 1 | 0 | 0 | 1 | 0 | 2 | 1 | . | 5 |
| Nagaya<br>2002             | 1 | 0 | 0 | 1 | 2 | 2 | 1 | . | 7 |
| Pimenta<br>2012            | 0 | 0 | 0 | 1 | 0 | 2 | 1 | . | 4 |
| Puttonen<br>2009           | 1 | 0 | 0 | 1 | 0 | 2 | 1 | . | 5 |
| Sakata*<br>2003            | 1 | 1 | 1 | 1 | 2 | 1 | 1 | 1 | 9 |
| Santhanam<br>2014          | 0 | 0 | 0 | 1 | 0 | 2 | 1 | . | 4 |
| Sfredde<br>2010            | 1 | 1 | 1 | 1 | 0 | 2 | 1 | . | 7 |
| Sookoian<br>2007           | 1 | 0 | 0 | 1 | 0 | 2 | 1 | . | 5 |
| Suessen-<br>bacher<br>2011 | 0 | 0 | 0 | 2 | 0 | 2 | 1 | . | 5 |
| Tanigawa<br>2006           | 1 | 0 | 0 | 2 | 0 | 2 | 1 | . | 6 |
| Virkkunen<br>2007          | 1 | 0 | 0 | 1 | 0 | 2 | 1 | . | 5 |
| Yamasaki<br>1998           | 1 | 0 | 1 | 1 | 0 | 2 | 1 |   | 6 |
| Ohira<br>2000              | 0 | 0 | 0 | 1 | 2 | 2 | 1 | . | 6 |
| Kario<br>2002              | 1 | 0 | 0 | 1 | 0 | 2 | 1 | . | 5 |

Cohort studies: selection: 1) Representativeness of the exposed cohort; 2) Selection of the non exposed cohort; 3) Ascertainment of exposure; 4) Demonstration that outcome of interest was not present at start of study; comparability: 1) Comparability of cohorts on the basis of the design or analysis outcome: 1) Assessment of the outcome; 2) Was follow-up long enough for outcomes

---

to occur; 3) Adequacy of follow-up; Cross-sectional studies [9]:selection: 1)Representativeness of the sample; 2) Sample size; 3) Non-respondents; 4) Ascertainment of the exposure; comparability: 1) Confounding factors are controlled; outcome: 1) Assessment of the outcome; 2) Statistical tests



Table S4. Results from univariate meta-regression analysis.

| Outcome             |           |           |       |       |             |                |    |
|---------------------|-----------|-----------|-------|-------|-------------|----------------|----|
| Covariates          | Coeff.    | Sdt. Err. | t     | P> t  | 95%CI lower | 95%CI superior | N  |
| <b>Systolic BP</b>  |           |           |       |       |             |                |    |
| Male                | -1.369818 | 0.7570138 | -1.81 | 0.076 | -2.886907   | 0.147272       | 57 |
| Constant            | 2.209518  | .6203227  | 3.56  | 0.001 | .9663635    | 3.452673       |    |
| Age                 | -.0055317 | .0458452  | 0.12  | 0.904 | -0.097615   | 0.086551       | 52 |
| Constant            | 1.685725  | 1.820996  | 0.93  | 0.359 | -1.971853   | 5.343303       |    |
| Smoking             | -2.827923 | 2.216863  | -1.28 | 0.209 | -7.308369   | 1.652524       | 42 |
| Constant            | 2.405204  | .9814952  | 2.45  | 0.019 | .421528     | 4.388879       |    |
| BMI                 | -.2229164 | .2352946  | -0.95 | 0.349 | -0.699245   | 0.253413       | 40 |
| Constant            | 7.172097  | 5.857529  | 1.22  | 0.228 | -4.685851   | 19.03004       |    |
| <b>Diastolic BP</b> |           |           |       |       |             |                |    |
| Male                | -.8186015 | .5205969  | -1.57 | 0.122 | -1.863256   | 0.226053       | 54 |
| Constant            | 1.152487  | .4305318  | 2.68  | 0.010 | .2885619    | 2.016412       |    |
| Age                 | -.0016895 | .0305026  | -0.06 | 0.956 | -0.063019   | 0.059640       | 50 |
| Constant            | .7217071  | 1.222945  | 0.59  | 0.558 | -1.737188   | 3.180603       |    |
| Smoking             | -1.696456 | 1.489377  | -1.14 | 0.262 | -4.709004   | 1.316093       | 41 |
| Constant            | 1.28408   | .6549514  | 1.96  | 0.057 | -.0406845   | 2.608844       |    |
| BMI                 | .0177833  | .1553774  | 0.11  | 0.910 | -0.2973366  | 0.332903       | 38 |
| Constant            | .2409512  | 3.874287  | 0.06  | 0.951 | -7.616467   | 8.09837        |    |

Outcome/target variables included SBP and DPB; SBP: systolic blood pressure; DBP: diastolic blood pressure; BMI: body mass index; Coeff: regression coefficient; Sdt. Err.: Standard Error; t:t value; P>|t|: 2-tailed p-value; 95%CI: 95% confidence intervals (lower and superior limits); N: number of estimates included in each analysis.

Table S5. Results from multivariate meta-regression analysis.

| Outcome             |           |           |       |       |             |                |    |
|---------------------|-----------|-----------|-------|-------|-------------|----------------|----|
| Covariates          | Coeff.    | Sdt. Err. | t     | P> t  | 95%CI lower | 95%CI superior | N  |
| <b>Systolic BP</b>  |           |           |       |       |             |                |    |
| Male                | 1.07127   | 1.63436   | -0.66 | 0.520 | -4.480485   | 2.337945       |    |
| Age                 | -.0032181 | .0684423  | -0.05 | 0.963 | -0.145986   | 0.139551       |    |
| Smoking             | -1.715447 | 3.822679  | -0.45 | 0.658 | -9.689417   | 6.258522       |    |
| BMI                 | -.1138207 | .3470926  | -0.33 | 0.746 | -0.837843   | 0.610202       |    |
| Constant            | 6.461052  | 8.352878  | 0.77  | 0.448 | -10.96275   | 23.88485       | 25 |
| <b>Diastolic BP</b> |           |           |       |       |             |                |    |
| Male                | -1.769282 | 1.105564  | -1.60 | 0.125 | -4.075447   | 0.536883       |    |
| Age                 | -.0074459 | .0446607  | -0.17 | 0.869 | -0.100607   | 0.085715       |    |
| Smoking             | -.3756096 | 2.47611   | -0.15 | 0.881 | -5.540685   | 4.789466       |    |
| BMI                 | .1840371  | .2231893  | 0.82  | 0.419 | -0.281528   | 0.649602       |    |
| Constant            | -1.89018  | 5.388936  | -0.35 | 0.729 | -13.13130   | 9.350943       | 25 |

Outcome/target variables included SBP and DPB; SBP: systolic blood pressure; DBP: diastolic blood pressure; BMI: body mass index; Coeff: regression coefficient; Sdt. Err.: Standard Error; t:t value; P>|t|: 2-tailed p-value; 95%CI: 95% confidence intervals (lower and superior limits); N: number of estimates included in each analysis.
